# Supplementary material for: Prenatal diagnosis of fetuses conceived by assisted reproductive technology by karyotyping and chromosomal microarray analysis
Source: PeerJ. 2023 Jan 17;11:e14678. doi: 10.7717/peerj.14678 (PMC9854383; doi:10.7717/peerj.14678)
Supplement: Data S1 — karyotype:1 trisomy 21; 2 Sex chromosome abnormalities; 3 inversion; 4 translocation; 5 other abnormalities; 6 polymorphism; VOUs: 1 pathogenic/likely pathogenic; 2 VOUs [file peerj-11-14678-s001.xlsx]

## Sheet: Sheet2
karyotype	1	trisomy 21
	2	Sex chromosome abnormalities
	3	inversion
	4	translocation
	5	other abnormalities
	6	polymorphism
CMA	1	pathogenic/likely pathogenic
	2	VOUs

## Sheet: non-isolated ART
No	Year	DA(week+day)		karyotype	CMA
A1068	25	17	0	6	0
1691	26	17	5	4	0
1857	31	17	6	0	0
1957	31	18	0	0	0
2597	34	18	1	0	0
2048	31	19	5	0	0
2258	30	18	2	4	0
2545	29	20	3	0	0
2045	29	19	6	0	0
2732	35	20	4	0	0
2734	24	17	3	0	0
2887	36	21	2	0	0
2926	34	18	4	4	0
2952	41	21	1	0	0
3194	30	20	0	4	0
3319	23	20	5	0	0
3371	25	20	3	0	2
3383	27	20	3	0	0
3602	28	21	2	4	0
3608	32	18	5	0	0
3638	32	18	0	0	0
3665	29	18	6	4	0
3688	27	20	1	4	0
3689	39	19	4	0	0
3712	37	23	0	0	0
3725	34	19	5	6	0
3775	28	17	5	0	0
3788	30	19	0	6	0
3835	29	19	5	0	0
3924	29	19	2	0	1
4149	24	19	5	4	0
4299	24	19	3	6	0
4332	29	19	0	0	0
4333	43	18	3	0	0
4349	28	19	1	6	0
4363	35	18	1	0	0
4384	33	18	4	6	0
4401	34	22	5	3	0
4419	23	21	1	3	0
4438	39	18	0	0	0
4477	37	20	0	0	0
4481	28	19	4	0	2
4485	36	18	3	0	0
4615	39	19	6	0	0
4643	31	19	2	4	0
4668	36	21	2	0	0
4673	35	18	6	0	0
4685	36	18	6	0	0
4703	31	18	5	0	0
4705	26	19	2	0	0
4811	28	22	1	2	1
4819	31	22	1	0	0
4845	35	18	2	0	0
4857	31	18	4	1	1
4858	34	18	0	0	0
4862	28	19	5	0	0
4871	37	20	2	1	1
4878	32	19	2	0	0
4950	34	19	0	0	2
5075	40	19	1	0	0
5085	35	20	6	6	0
5095	35	19	3	0	0
5126	21	18	4	0	0
5145	38	18	2	0	0
5236	30	18	4	6	0
5250	41	18	3	1	1
5276	44	21	2	0	0
5314	25	19	0	0	0
5335	39	18	4	0	0
5371	34	18	4	0	0
5435	37	25	3	0	0
5490	32	22	4	0	0
5515	37	19	0	0	0
5516	30	21	3	0	2
5522	34	19	3	0	0
5528	32	20	6	0	0
5536	22	21	4	0	0
5541	22	21	2	0	0
5597	33	18	2	4	0
5606	31	18	6	0	0
5624	35	18	1	0	0
5681	40	20	1	0	0
5710	37	19	6	0	0
5723	32	18	6	6	0
5783	39	20	6	0	0
A6273	34	18	5	0	0
6904	35	19	2	0	0
C20A1659	34	18	5	0	0
C20A1660	28	19	0	0	0
C20A1688	31	18	5	0	0
C21A0013	28	19	6	6	0
C21A0014	31	22	4	0	0
C21A0034	38	18	4	0	0
C21A0035	36	28	4	0	0
C21A0087	36	20	6	0	0
C20A0099	36	19	2	7	0
C20A0112	30	18	3	4	0
C20A0130	29	19	0	0	0
C20A0140	30	19	1	0	0
C20A0146	29	18	2	0	0
C20A0178	26	18	3	0	0
C20A0231	31	18	2	0	0
C20A0230	32	20	5	2	1
C20A0238	29	19	2	2	1
C21A0321	29	18	4	0	0
C21A0342	33	25	5	0	0
C21A0366	32	20	0	0	0
C21A0444	42	26	2	1	1
C21A0485	33	19	3	0	0
C21A0553	41	18	2	0	0
C21A0586	32	20	2	0	0
C21A056	33	18	3	0	0
C21A283	26	18	1	0	1
C21A327	35	18	6	0	0
C21A379	40	20	1	0	0
C21A414	41	19	3	0	0
C21A452	34	19	27	0	0
TC21A190	34	21	5	0	0
TC21A204	45	18	6	0	0
TC21A233	38	18	6	3	0
TC21A267	39	19	2	2	1
TC21A278	33	18	3	0	0
TC21A299	36	18	0	0	0
TC21A302	38	19	0	0	0
TC21A323	32	18	3	4	0
TC21A390	29	18	6	4	0
TC21A450	51	18	3	0	0
TC21A508	34	19	4	0	0
TC21A514	33	19	6	0	0
TC21A519	29	20	1	7	0
TC21A528	38	20	1	0	0
TC21A542	35	19	1	0	0
TC21A553	26	18	3	4	0
TC21A565	30	19	0	0	0
TC21A580	38	19	2	0	0
TC21A591	33	20	2	0	0
TC21A617	26	19	5	4	0
TC21A634	40	19	2	0	0
TC21A645	33	18	0	0	0
TC21A676	41	18	4	0	0

## Sheet: isolated ART
No	Year	GA(week)	day	karyotype	CMA
1685	41	18	0	0	0
2512	34	18	0	0	0
3151	32	20	1	0	0
3207	28	20	2	0	0
3430	29	20	6	0	0
3465	30	20	0	6	0
3485	30	20	2	0	0
4297	28	20	0	0	0
3494	31	19	2	7	0
3629	31	19	4	6	1
3644	24	19	3	7	0
3934	31	18	4	0	0
4102	34	18	4	0	0
4652	20	20	0	0	0
4713	26	21	2	0	0
4767	30	22	1	0	0
5121	29	19	3	0	0
5586	30	18	6	0	0
A6260	37	18	2	0	0
C20A1658	34	18	2	0	0
C20A0097	26	19	3	0	0
C20A0127	31	24	3	0	0
C20A0202	30	23	0	0	0
C21A0489	30	19	3	0	0
C21A0536	34	22	2	0	0
C21A057	31	18	1	0	1
C21A184	32	18	4	0	0
C21A253	31	18	1	0	0
C21A254	33	18	6	0	0
C21A291	33	18	0	0	0
TC21A211	34	18	5	0	0
TC1A425	31	18	4	0	0
TC21A453	21	19	0	0	0
TC21A567	31	20	1	0	0
1733	35	18	2	0	0
3142	40	20	5	0	0
3490	38	18	3	0	0
3979	35	19	2	0	0
4075	39	19	5	0	0
4077	40	19	0	0	0
4223	41	18	4	0	0
4264	38	22	0	0	2
4284	43	19	1	0	0
4285	38	19	6	0	0
4306	43	20	2	0	0
4383	37	19	4	0	0
4733	40	20	1	0	0
5061	39	19	6	0	0
5129	41	18	3	0	0
5132	37	20	3	0	2
5256	35	20	0	0	0
5517	38	22	3	0	0
5532	42	20	3	0	0
5564	35	18	6	0	0
5572	36	18	5	0	0
5579	37	20	5	0	0
5719	38	18	1	0	0
6916	39	18	5	0	0
C20A1672	35	19	0	0	0
C21A0001	39	18	5	0	0
C21A0093	37	18	6	0	0
C20A0110	39	19	6	0	0
C20A0111	37	18	2	0	1
C20A0139	36	18	1	0	0
C20A0151	38	19	5	0	0
C20A0157	43	18	6	0	0
C20A0161	35	22	2	0	0
C20A0276	36	19	3	0	0
C20A0298	35	18	6	0	0
C21A0443	37	20	6	0	0
C21A0501	44	19	0	0	0
C21A0614	39	19	1	6	0
C21A081	40	18	4	0	0
C21A168	39	18	6	0	0
C21A186	38	20	2	0	1
C21A206	37	28	3	0	0
C21A217	38	20	1	0	0
C21A325	36	20	3	0	0
TC21A96	37	19	1	0	0
TC21A258	38	20	5	0	0
TC21A497	40	18	5	0	0
TC21A564	36	18	4	0	0
TC21A630	38	20	5	0	0
TC21A646	40	19	3	0	0
