# Supplementary material for: Prenatal diagnosis of fetuses conceived by assisted reproductive technology by karyotyping and chromosomal microarray analysis
Source: PeerJ. 2023 Jan 17;11:e14678. doi: 10.7717/peerj.14678 (PMC9854383; doi:10.7717/peerj.14678)
Supplement: Supplemental Information 2 — karyotype: 1 trisomy 21; 2 Sex chromosome abnormalities; 3 inversion; 4 translocation; 5 other abnormalities;6 polymorphism; VOUs: 1 pathogenic/likely pathogenic; 2 VOUs [file peerj-11-14678-s002.xlsx]

## Sheet: Karyotype
NO	Year	DA(week+day)		karyotype	CMA
1643	40	18	3	0	0
1724	29	18	2	6	0
1765	38	18	4	0	0
1776	36	19	3	0	0
1955	40	17	6	0	0
2182	39	18		0	0
2203	36	18		0	0
2305	40	18	6	0	0
2318	42	18	1	0	0
2375	38	17	5	0	2
2596	41	18	3	6	0
2611	42	18	5	0	0
2691	34	17	4	0	0
2766	39	20		0	0
2759	38	17	5	0	0
2770	33	18	3	0	2
2811	42	18		0	0
2817	41	18	2	0	0
2958	41	20	1	0	2
3119	40	20		0	0
3172	34	19	3	0	2
3187	36	18	3	0	0
3196	40	18	5	0	0
3193	28	18		0	0
3244	44	19	4	6	0
3248	36	19	5	0	0
3331	36	21	2	0	0
3375	45	18	4	0	0
3399	42	18	2	0	0
3404	44	18	1	0	0
3425	38	17	6	0	2
3445	47	17	6	0	0
3450	37	18		6	0
3455	44	17	3	0	2
3458	37	18	1	0	0
3460	38	18	6	0	0
3464	45	18	5	0	0
3482	41	19		0	0
3488	40	18	5	0	0
3493	37	18	3	0	0
3497	44	19	2	0	0
3504	36	18	4	0	2
3513	34	18	4	0	0
3514	33	19	2	0	0
3521	38	18	3	0	2
3530	36	19		0	2
3541	40	18	1	0	2
3550	36	18		0	0
3564	42	18	6	0	0
3569	36	20	1	0	0
3571	41	20	2	0	0
3577	34	20	4	0	0
3595	34	17	3	0	0
3597	36	18	5	0	0
3603	42	20	1	0	0
3600	40	21	6	0	0
3607	37	19		4	0
3611	36	18	3	0	2
3614	30	23	1	0	0
3623	35	20		0	0
3632	39	18	3	0	0
3635	42	20	5	0	0
3640	37	17	6	0	0
3637	34	18	4	0	0
3636	40	18	6	0	0
3645	36	18	2	0	0
3666	40	18		0	0
3667	27	18	2	0	0
3682	43	18	3	0	0
3679	35	18	3	0	0
3676	35	18	1	0	0
3699	30	18	2	0	0
3722	35	18		0	0
3737	38	18	1	0	0
3735	34	18	1	0	0
3738	39	18	6	0	0
3729	40	19	6	0	0
3754	45	20		0	0
3759	42	18	5	0	0
3770	41	19	4	6	0
3776	39	18	2	0	0
3779	37	20	5	0	0
3781	37	18	3	0	0
3784	41	20	4	0	0
3791	41	18	5	0	0
3797	35	18	4	0	0
3809	41	18	6	0	0
3802	42	18	3	0	0
3803	36	19	2	0	0
3815	39	19	3	0	0
3814	36	19		0	0
3827	37	18	6	6	0
3864	35	18	1	0	2
3872	46	18	4	0	0
3871	37	18	6	0	0
3881	41	18	2	6	0
3880	37	19		0	0
3893	42	18	2	0	0
3899	43	20	3	0	0
3897	43	18	5	0	0
3905	40	18	1	0	0
3903	41	19	1	0	0
3901	42	18		0	0
3911	36	18	6	0	0
3915	39	18	6	0	0
3913	41	17	6	0	0
3927	35	18		0	0
3959	41	18	3	1	1
3966	24	18	2	0	0
3965	40	20	4	0	0
3969	44	21	3	0	0
3985	39	19		0	0
3984	41	22	2	0	0
4014	36	20	3	0	0
4016	38	19	1	0	0
4017	42	18	1	0	0
4022	48	18	4	0	0
4034	40	18	4	0	0
4061	42	19	5	0	0
4058	36	20	1	0	0
4094	39	18	1	0	0
4118	31	20	1	0	0
4141	35	20		0	0
4138	40	19	5	0	0
4145	38	18	2	0	0
4155	43	19	2	0	0
4157	40	19	3	0	0
4161	42	18	3	0	0
4160	37	22	1	0	0
4169	42	18	6	0	0
4172	40	19	2	0	0
4177	38	19	2	0	0
4183	29	18	5	0	0
4191	39	18	2	6	0
4195	34	18	2	0	0
4204	42	21	0	0	0
4205	41	19	0	0	0
4218	35	20	0	0	0
4248	44	19	1	0	0
4253	42	19	2	0	0
4265	38	19	1	0	2
4268	39	19	1	0	0
4274	39	20	3	0	0
4290	39	19	5	0	0
4293	34	20	3	6	0
4295	39	20	3	0	0
4305	37	19	4	0	2
4309	35	18	5	0	0
4322	40	19	1	0	0
4341	37	18	0	0	0
4354	36	19	6	0	0
4356	21	18	5	6	0
4358	35	18	6	0	0
4365	44	18	3	0	0
4388	27	19	4	6	0
4424	41	19	2	0	0
4449	37	22	1	0	0
4465	37	21	0	0	0
4467	40	18	6	0	0
4487	44	18	3	0	0
4492	43	19	5	0	0
4496	37	19	2	0	0
4498	42	19	0	0	0
4503	43	18	5	0	0
4513	40	18	1	0	0
4518	35	18	5	0	0
4525	35	18	5	0	0
4531	39	18	6	6	0
4551	37	18	3	0	0
4552	25	21	4	0	0
4559	40	20	1	0	0
4568	33	19	4	0	0
4579	40	18	5	0	0
4582	42	21	3	0	0
4585	40	19	5	0	0
4588	35	18	5	0	0
4592	34	18	6	0	0
4593	44	19	5	0	0
4594	41	18	5	0	0
4595	41	19	6	6	0
4603	40	19	0	0	0
4618	36	18	6	0	0
4619	32	18	1	0	0
4620	34	17	5	0	0
4641	35	18	1	0	0
4647	39	19	3	0	0
4650	34	19	6	0	0
4669	40	18	1	0	0
4676	40	19	2	0	0
4688	35	20	2	0	0
4692	41	20	2	0	0
4719	40	19	6	0	0
4722	38	20	0	0	0
4741	39	19	1	0	0
4748	41	18	5	0	0
4752	39	21	3	6	0
4779	36	18	2	0	0
4780	44	20	0	0	0
4791	39	18	3	0	0
4796	37	18	5	0	0
4798	40	20	3	0	0
4799	34	19	4	0	2
4800	42	19	5	0	0
4806	42	18	6	0	0
4821	39	19	5	0	0
4827	38	20	1	0	0
4833	38	19	5	0	0
4836	37	19	4	0	0
4849	37	18	1	0	0
4888	44	19	1	0	0
4889	39	18	2	6	0
4891	41	18	4	0	0
4899	37	19	3	0	0
4905	37	18	6	0	0
4921	36	19	4	0	0
4923	36	18	5	0	0
4932	43	19	2	0	0
4933	46	22	5	0	0
4944	36	20	2	0	0
4949	41	18	5	0	0
4953	45	18	6	0	0
4957	43	19	2	0	0
4969	39	20	2	2	1
4982	37	19	2	0	0
4986	36	18	5	0	0
4998	44	19	5	0	0
4999	39	18	3	0	0
5000	41	18	1	0	0
5001	35	19	4	0	0
5002	36	21	3	0	0
5012	40	19	0	0	0
5022	35	18	3	0	0
5027	43	19	6	0	0
5028	39	20	0	0	0
5036	39	18	3	0	0
5042	40	20	3	0	0
5045	34	18	1	0	0
5057	42	18	2	0	0
5058	36	19	6	0	0
5064	35	20	3	0	0
5070	31	20	0	0	0
5074	37	18	4	0	0
5076	26	20	0	0	2
5082	41	18	2	0	0
5103	34	19	5	0	0
5106	36	20	1	0	0
5111	38	19	4	0	0
5125	35	19	5	0	0
5136	38	18	4	0	1
5159	41	18	2	6	0
5164	33	18	6	0	0
5168	33	19	1	0	0
5180	39	18	3	0	0
5183	37	19	6	0	0
5251	36	20	0	0	0
5257	37	22	1	6	0
5271	39	19	3	0	0
5277	43	18	5	0	0
5285	40	19	4	0	0
5292	35	20	5	0	0
5294	35	19	5	0	0
5295	37	23	6	0	0
5303	40	19	31	0	2
5304	37	19	4	0	0
5316	29	19	6	0	0
5319	35	18	6	0	0
5330	34	18	5	0	0
5331	37	20	1	6	0
5336	35	18	5	0	0
5340	36	20		0	0
5347	43	19	6	6	0
5355	39	20	3	0	0
5360	39	18	4	0	0
5369	35	19	3	0	0
5375	41	20	3	0	0
5384	37	18		0	2
5392	35	18	5	0	0
5413	47	18	1	0	0
5414	36	20	2	0	0
5416	34	20	6	0	0
5421	38	21	3	0	0
5432	38	21	1	0	0
5442	39	20		0	0
5446	39	18	2	0	0
5449	40	18	2	0	0
5452	35	19	6	0	0
5472	41	21	1	0	0
5477	36	18		0	0
5479	36	19	4	0	0
5492	31	18	4	0	0
5499	38	19		0	0
5506	40	19	4	0	0
5510	38	19	3	0	0
5511	36	19	2	0	0
5519	34	23	1	0	0
5526	31	20		0	2
5539	38	22	2	0	0
5545	38	23	4	0	0
5554	38	18	6	0	0
5556	39	19	3	0	0
5569	35	18	4	0	1
5570	36	25	2	0	0
5580	37	18	5	0	0
5591	41	18	3	0	0
5599	36	20	3	0	0
5602	39	18	5	0	0
5607	38	18	4	0	0
5609	32	20	2	0	0
5610	38	18	4	0	0
5629	40	19		0	0
5631	43	21	3	0	2
5649	43	18	4	0	0
5655	39	19	3	0	0
5663	38	18	4	0	0
5665	40	19	3	0	0
5668	38	19		0	0
5673	43	25	4	0	0
5675	43	19		0	0
5678	38	19		0	0
5683	39	18	3	0	0
5692	45	18	6	0	0
5694	38	18	4	0	2
5701	37	19	2	0	0
5709	43	20		0	0
5732	37	18	2	0	0
5737	39	18	4	0	0
5738	43	19	4	0	0
5748	38	21	2	0	0
5752	36	18	4	0	0
5774	42	19	2	0	1
5790	32	27		0	0
5796	43	18	6	0	0
5798	44	19	5	0	0
5805	37	20	3	0	0
5814	44	18	2	0	0
5829	35	19	3	0	0
5841	35	19	3	0	0
5842	30	18	6	0	0
5847	39	19	1	0	0
5849	38	19		0	0
5855	35	19	5	0	0
5856	35	20	6	0	0
5869	39	18	2	0	0
5910	42	19	2	0	0
5921	46	18	2	0	0
5928	43	18	2	0	0
5937	39	18	6	0	0
5943	37	18	4	0	0
5945	32	27	2	0	0
5960	34	20		0	0
5975	36	18	5	0	0
5981	35	18	5	0	0
5995	38	19	2	6	0
5997	42	20	4	0	0
6005	40	18	3	0	0
6006	37	20		0	0
6015	45	18	1	0	0
6024	41	19	5	0	0
6028	36	24	4	0	0
6039	43	18	6	0	0
6067	41	20	1	0	0
6077	36	19	2	0	0
6088	43	19	1	0	0
6094	39	19		0	0
6096	36	19	5	0	0
6100	39	18	6	0	0
6106	36	21	4	0	0
6107	36	18	3	0	0
6111	37	18	2	0	0
6112	41	18	4	0	0
6115	30	24	6	0	0
6119	39	19	1	0	0
6120	39	18	6	0	0
6133	35	19	2	0	0
6136	32	20		0	0
6137	38	19	3	0	0
6141	36	19		0	0
6157	35	19	4	0	0
6159	34	18	6	0	0
6164	37	20	2	0	2
6172	38	18	3	0	0
6174	42	19	4	0	0
6178	34	18	3	0	0
6182	39	20	2	0	0
6198	38	18	5	0	0
6199	42	18	6	0	2
6206	41	20	4	0	0
6209	38	19	4	0	0
6227	38	26	4	0	0
6244	36	20	3	0	0
6254	37	18	3	0	0
6264	36	20	6	0	0
6271	43	18	3	0	0
6272	37	26	0	0	0
6308	34	18	4	0	0
6313	36	18	4	0	0
6327	40	19	3	0	0
6338	34	21	3	0	0
6341	41	20	1	0	0
6342	41	18	6	0	0
6379	34	20		0	0
6381	34	19	3	0	0
6390	36	18	4	0	0
6393	39	18	3	0	0
6419	35	19	3	0	0
6443	39	19	2	0	0
6471	41	18	4	0	0
6475	38	18	2	0	0
6506	31	27	4	0	0
6514	37	20	4	0	0
6534	28	22		0	0
6541	38	19	5	0	0
6544	39	19	2	0	0
6547	37	18		0	0
6557	38	22	4	0	0
6583	36	22	4	0	0
6598	30	19	4	0	0
6600	41	20	1	0	0
6607	38	20	3	0	0
6612	41	19	2	0	0
6616	37	23	6	0	0
6627	35	20	1	0	0
6637	36	20	3	0	0
6645	36	18	6	0	0
6650	37	18	4	0	0
6655	43	19		0	0
6658	38	19	4	0	0
6667	44	19	1	0	0
6670	37	18	2	0	0
6674	35	20	4	0	1
6675	34	20		0	0
6676	42	25	4	0	0
6678	40	19	1	0	0
6690	40	18	5	0	0
6703	41	20	5	0	0
6704	43	24	0	0	0
6715	40	19	5	0	0
6725	35	19	1	0	0
6744	41	18		0	0
6759	46	18	3	2	1
6767	36	18	3	0	0
6779	39	19	2	0	0
6784	45	20	1	0	0
6810	38	19	4	0	0
6843	36	19	4	0	0
6844	35	19	4	0	0
6845	39	18	3	0	0
6856	37	18	1	0	0
6872	43	19	5	0	0
6875	30	19	5	0	0
6898	39	19	0	0	0
6908	40	18	2	0	0
6923	41	19		0	0
C20A1643	23	19	1	0	0
C20A1647	35	19	2	0	0
C20A1649	38	18	3	0	0
C20A1654	37	20	1	0	0
C21A0017	40	19	1	0	0
C21A0053	38	18	6	0	0
C21A0067	40	18	1	0	0
C20A0116	38	19		0	0
C20A0119	36	20	4	0	0
C20A0122	37	19	5	0	0
C20A0149	40	18	6	0	0
C20A0177	38	19	6	0	0
C20A0191	36	19	5	0	0
C20A0197	41	18	4	0	0
C20A0221	36	19	2	0	0
C20A0243	43	19	3	6	0
C20A0245	36	22	6	0	0
C20A0254	39	19	5	0	0
C20A0273	36	19	4	0	0
C20A0277	39	19		0	0
C20A0283	39	19	2	0	0
C20A0285	34	20	6	0	0
C20A0296	36	23	6	0	2
C20A0306	38	20		3	0
C21A0316	36	20	1	0	0
C21A0331	39	19	3	0	0
C21A0336	35	18	0	0	0
C21A0352	31	19	2	0	0
C21A0356	40	18	2	0	0
C21A0362	42	20	4	0	0
C21A0395	29	19	6	0	0
C21A0396	32	19	4	0	0
C21A0399	40	21	4	0	0
C21A0402	34	18	1	0	0
C21A0409	33	19	1	0	0
C21A0410	36	18	2	0	0
C21A0411	40	19	3	0	0
C21A0420	38	19	0	0	0
C21A0440	34	19	0	0	0
C21A0441	39	19	2	0	0
C21A0449	43	19	6	0	0
C21A0456	38	18	3	0	0
C21A0459	37	19	1	0	0
C21A0471	41	19	2	0	0
C21A0492	35	18	3	0	0
C21A0493	35	18	2	0	0
C21A0504	44	20	5	0	0
C21A0507	42	20	2	0	0
C21A0511	40	18	4	0	0
C21A0519	34	19	3	0	0
C21A0525	41	20	6	0	0
C21A0530	35	18	5	0	0
C21A0551	35	18	6	0	0
C21A0557	36	18	1	0	0
C21A0581	38	19	0	6	0
C21A0587	31	18	5	0	0
C21A0596	38	18	0	0	0
C21A0624	34	23	2	0	0
C21A0625	45	18	6	0	0
C21A0634	45	19	1	0	2
C21A0651	39	20	2	0	0
C21A077	39	23	1	0	0
C21A135	40	18	4	0	0
C21A164	32	18	6	0	0
C21A194	40	18	5	0	0
C21A197	31	18	6	0	0
C21A199	38	23	5	0	0
C21A203	41	18	5	0	2
C21A229	37	19	2	0	0
C21A263	38	18	4	0	0
C21A271	39	18	4	0	2
C21A294	34	18	6	0	0
C21A295	42	18	6	0	0
C21A303	34	18	4	0	0
C21A307	38	20	5	0	0
C21A338	45	18	3	0	0
C21A363	35	18	5	0	0
C21A368	40	18	5	0	0
C21A371	32	19	3	0	0
C21A374	37	20		0	0
C21A390	35	19	3	0	0
C21A393	35	19	2	0	2
C21A407	38	19	6	0	0
C21A413	40	22	5	0	1
C21A417	41	18	3	0	0
C21A422	37	19	1	0	0
C21A434	37	19	4	0	0
C21A436	32	20		0	0
C21A437	38	20	6	0	0
C21A445	34	19	2	0	0
C21A448	42	18	2	0	0
TC21A10	34	18	6	0	0
TC21A12	37	18	3	0	0
TC21A32	39	21	1	0	0
TC21A50	46	22		0	0
TC21A94	38	18	3	0	0
TC21A104	37	19	1	0	0
TC21A127	34	19	1	0	0
TC21A142	36	18	5	0	0
TC21A143	35	19	2	0	0
TC21A153	20	18	3	0	0
TC21A167	35	18	4	0	0
TC21A172	36	18	5	0	0
TC21A174	40	19	6	0	2
TC21A192	42	23	6	0	0
TC21A214	43	19	3	0	0
TC21A218	41	19		0	0
TC21A222	37	18	1	0	0
TC21A236	21	20	3	0	0
TC21A238	38	18	6	0	0
TC21A243	39	19	1	0	0
TC21A253	41	18	6	0	0
TC21A257	41	18	6	0	0
TC21A305	38	18	4	0	0
TC21A307	29	18	1	0	0
TC21A320	35	19	1	0	0
TC21A332	34	20	1	0	0
TC21A348	39	19	1	0	0
TC21A354	38	18	4	0	2
TC21A372	38	20		0	0
TC21A377	39	18	6	5	1
TC21A381	38	20	4	0	2
TC1A422	37	19	2	0	0
TC21A448	37	20	1	0	0
TC21A464	36	19	1	0	0
TC21A480	42	21	1	0	0
TC21A489	34	19	5	0	0
TC21A490	33	19	1	0	0
TC21A494	37	19	3	0	0
TC21A502	36	19	6	0	0
TC21A517	35	19	5	0	0
TC21A522	38	19	2	0	0
TC21A532	36	18	5	0	0
TC21A533	27	19	2	0	0
TC21A536	37	18	4	0	0
TC21A537	29	20		0	0
TC21A540	34	19	6	0	0
TC21A544	39	19		0	0
TC21A546	37	18	5	0	0
TC21A547	37	20		0	0
TC21A574	33	18	4	0	0
TC21A576	35	18	4	0	0
TC21A587	42	20	1	0	0
TC21A590	47	18	5	0	0
TC21A608	38	19		0	0
TC21A611	36	18	4	0	2
TC21A616	40	22	2	0	0
TC21A636	36	19		0	0
TC21A639	41	19	1	0	0
TC21A674	38	18	4	0	0
TC21A679	24	19	1	0	0
TC21A689	39	18	2	0	0
TC21A697	41	20		0	0
TC21A715	36	19	3	0	0
TC21A718	43	18	4	0	0
TC21A735	33	18	5	0	0
TC21A743	41	20	6	0	0
TC21A746	45	21	5	0	0
TC21A757	43	18	3	0	0
	37.8676	27			1.65
	3.93779	17
	48
	20

## Sheet: Sheet5
				karyotype	1	trisomy 21
					2	Sex chromosome abnormalities
					3	inversion
					4	translocation
					5	other abnormalities
					6	polymorphism
				CMA	1	pathogenic/likely pathogenic
					2	VOUs
